# Supplementary material for: Spatial temporal distribution of COVID-19 risk during the early phase of the pandemic in Malawi
Source: PeerJ. 2021 Feb 24;9:e11003. doi: 10.7717/peerj.11003 (PMC7912604; doi:10.7717/peerj.11003)
Supplement: Supplemental Information 1 [file peerj-09-11003-s001.csv]

y	cumulative	dead	idtime	idtime2	idarea	idarea2	idint	district	population	density	water	nophone	noradio	plusfourinroom	soaphandwash	notv	notoilet	moreage	poverty
0	37	3	1	1	1	1	1	dedza	825925	221	3	65.6	75	16.1	15.3	95.1	6.6	4.4	63.1
0	37	3	1	1	2	2	2	dowa	938620	251	4.1	54.6	70.5	13.2	7.5	94.3	4.9	3.9	48.8
0	37	3	1	1	3	3	3	kasungu	1001534	105	5.1	47	67.2	12.8	13.8	92.7	4.9	3.1	53
23	37	3	1	1	4	4	4	lilongwe	1643430	282	2.3	63.3	75.3	15.8	9.9	95.2	8.4	4	47.9
0	37	3	1	1	5	5	5	mchinji	703150	192	4.8	54.1	72.4	21.5	10.4	93.5	11.5	3.2	50.5
1	37	3	1	1	6	6	6	nkhotakota	444408	91	9.4	46.5	70.5	12	10.7	90.7	9.4	3.3	53.4
0	37	3	1	1	7	7	7	nctheu	653573	203	1.6	57.5	71.6	17.6	5.7	93.8	6.4	4.4	54.1
0	37	3	1	1	8	8	8	ncthisi	337459	186	4.5	52.6	71.5	10.7	3.1	94.6	4	3.8	53.5
0	37	3	1	1	9	9	9	salima	486166	222	7	51.5	70.6	11.6	9.3	92.1	5.3	3.7	58.4
23	37	3	1	1	10	10	10	lilongwe	1643430	282	2.3	63.3	75.3	15.8	9.9	95.2	8.4	4	47.9
0	37	3	1	1	11	11	11	chitipa	247196	54	9.3	46.3	60.9	3.8	6	91.4	0.8	3.8	73.8
1	37	3	1	1	12	12	12	karonga	393957	107	16.3	38.9	67.7	2.6	24.7	89	6.2	3.4	57.1
1	37	3	1	1	13	13	13	mzimba	237914	90	6.4	37.1	64.3	9.8	13.8	86.8	8.2	4.2	42.9
0	37	3	1	1	14	14	14	nkhatabay	316018	68	12.3	28.1	63.9	8.3	9	84.3	6.2	4	57.7
0	37	3	1	1	15	15	15	rumphi	237914	50	17.8	33.5	69.4	4.4	15.9	88.4	3	3.5	53.6
0	37	3	1	1	16	16	16	likoma	10523	726	79.7	19.4	52.4	2.4	21	65.9	6.5	3.9	31.4
1	37	3	1	1	17	17	17	mzuzu	237914	90	6.4	37.1	64.3	9.8	13.8	86.8	8.2	4.2	42.9
9	37	3	1	1	18	18	18	blantyre	447177	253	7.6	48.6	67.2	8.2	9.1	88.6	6.1	4.2	38.9
1	37	3	1	1	19	19	19	chikwawa	619645	116	6.9	52.9	70.1	9.8	10.7	93.7	9.2	4	63.2
0	37	3	1	1	20	20	20	chiradzulu	340614	469	1.3	58.9	69.8	4.3	13.3	94.2	6.5	5.2	66.4
0	37	3	1	1	21	21	21	machinga	712540	205	3.5	54.2	70.2	18.4	14.5	94.5	6.5	4	72.4
0	37	3	1	1	22	22	22	mangochi	1215905	171	5.7	52.9	73.3	21.9	12.4	92.7	3.4	3.9	59.5
0	37	3	1	1	23	23	23	mulanje	612153	341	8.8	54.1	65.5	5.8	4.4	93.2	7.2	4.7	69.2
0	37	3	1	1	24	24	24	mwanza	293902	133	7.8	52.6	65.9	24.6	4.9	87.6	4.8	3.5	53.6
0	37	3	1	1	25	25	25	nsanje	319635	154	3.5	56.5	74.9	12.3	6.1	94.7	14	4.7	74.3
0	37	3	1	1	26	26	26	thyolo	705136	433	2.9	56.3	67.8	7.4	12.6	93	7.8	4.6	67.3
1	37	3	1	1	27	27	27	zomba	725344	316	5.9	53.7	65.3	15	8.6	93.7	5.4	4.5	55.9
0	37	3	1	1	28	28	28	phalombe	426572	325	6.2	56.3	65.8	8.3	2.6	95.4	5.4	4.2	83.2
0	37	3	1	1	29	29	29	balaka	466518	205	6.1	47.2	66.5	18.6	14.7	91	4.2	4.4	61.3
9	37	3	1	1	30	30	30	blantyre city	447177	253	7.6	48.6	67.2	8.2	9.1	88.6	6.1	4.2	38.9
1	37	3	1	1	31	31	31	zomba	725344	316	5.9	53.7	65.3	15	8.6	93.7	5.4	4.5	55.9
0	279	4	2	2	1	1	32	dedza	825925	221	3	65.6	75	16.1	15.3	95.1	6.6	4.4	63.1
0	279	4	2	2	2	2	33	dowa	938620	251	4.1	54.6	70.5	13.2	7.5	94.3	4.9	3.9	48.8
0	279	4	2	2	3	3	34	kasungu	1001534	105	5.1	47	67.2	12.8	13.8	92.7	4.9	3.1	53
12	279	4	2	2	4	4	35	lilongwe	1643430	282	2.3	63.3	75.3	15.8	9.9	95.2	8.4	4	47.9
0	279	4	2	2	5	5	36	mchinji	703150	192	4.8	54.1	72.4	21.5	10.4	93.5	11.5	3.2	50.5
0	279	4	2	2	6	6	37	nkhotakota	444408	91	9.4	46.5	70.5	12	10.7	90.7	9.4	3.3	53.4
1	279	4	2	2	7	7	38	nctheu	653573	203	1.6	57.5	71.6	17.6	5.7	93.8	6.4	4.4	54.1
0	279	4	2	2	8	8	39	ncthisi	337459	186	4.5	52.6	71.5	10.7	3.1	94.6	4	3.8	53.5
0	279	4	2	2	9	9	40	salima	486166	222	7	51.5	70.6	11.6	9.3	92.1	5.3	3.7	58.4
12	279	4	2	2	10	10	41	lilongwe	1643430	282	2.3	63.3	75.3	15.8	9.9	95.2	8.4	4	47.9
0	279	4	2	2	11	11	42	chitipa	247196	54	9.3	46.3	60.9	3.8	6	91.4	0.8	3.8	73.8
1	279	4	2	2	12	12	43	karonga	393957	107	16.3	38.9	67.7	2.6	24.7	89	6.2	3.4	57.1
4	279	4	2	2	13	13	44	mzimba	237914	90	6.4	37.1	64.3	9.8	13.8	86.8	8.2	4.2	42.9
5	279	4	2	2	14	14	45	nkhatabay	316018	68	12.3	28.1	63.9	8.3	9	84.3	6.2	4	57.7
0	279	4	2	2	15	15	46	rumphi	237914	50	17.8	33.5	69.4	4.4	15.9	88.4	3	3.5	53.6
0	279	4	2	2	16	16	47	likoma	10523	726	79.7	19.4	52.4	2.4	21	65.9	6.5	3.9	31.4
4	279	4	2	2	17	17	48	mzuzu	237914	90	6.4	37.1	64.3	9.8	13.8	86.8	8.2	4.2	42.9
19	279	4	2	2	18	18	49	blantyre	447177	253	7.6	48.6	67.2	8.2	9.1	88.6	6.1	4.2	38.9
0	279	4	2	2	19	19	50	chikwawa	619645	116	6.9	52.9	70.1	9.8	10.7	93.7	9.2	4	63.2
0	279	4	2	2	20	20	51	chiradzulu	340614	469	1.3	58.9	69.8	4.3	13.3	94.2	6.5	5.2	66.4
0	279	4	2	2	21	21	52	machinga	712540	205	3.5	54.2	70.2	18.4	14.5	94.5	6.5	4	72.4
1	279	4	2	2	22	22	53	mangochi	1215905	171	5.7	52.9	73.3	21.9	12.4	92.7	3.4	3.9	59.5
1	279	4	2	2	23	23	54	mulanje	612153	341	8.8	54.1	65.5	5.8	4.4	93.2	7.2	4.7	69.2
0	279	4	2	2	24	24	55	mwanza	293902	133	7.8	52.6	65.9	24.6	4.9	87.6	4.8	3.5	53.6
2	279	4	2	2	25	25	56	nsanje	319635	154	3.5	56.5	74.9	12.3	6.1	94.7	14	4.7	74.3
10	279	4	2	2	26	26	57	thyolo	705136	433	2.9	56.3	67.8	7.4	12.6	93	7.8	4.6	67.3
1	279	4	2	2	27	27	58	zomba	725344	316	5.9	53.7	65.3	15	8.6	93.7	5.4	4.5	55.9
1	279	4	2	2	28	28	59	phalombe	426572	325	6.2	56.3	65.8	8.3	2.6	95.4	5.4	4.2	83.2
0	279	4	2	2	29	29	60	balaka	466518	205	6.1	47.2	66.5	18.6	14.7	91	4.2	4.4	61.3
19	279	4	2	2	30	30	61	blantyre city	447177	253	7.6	48.6	67.2	8.2	9.1	88.6	6.1	4.2	38.9
1	279	4	2	2	31	31	62	zomba	725344	316	5.9	53.7	65.3	15	8.6	93.7	5.4	4.5	55.9
13	1342	16	3	3	1	1	63	dedza	825925	221	3	65.6	75	16.1	15.3	95.1	6.6	4.4	63.1
11	1342	16	3	3	2	2	64	dowa	938620	251	4.1	54.6	70.5	13.2	7.5	94.3	4.9	3.9	48.8
11	1342	16	3	3	3	3	65	kasungu	1001534	105	5.1	47	67.2	12.8	13.8	92.7	4.9	3.1	53
220	1342	16	3	3	4	4	66	lilongwe	1643430	282	2.3	63.3	75.3	15.8	9.9	95.2	8.4	4	47.9
5	1342	16	3	3	5	5	67	mchinji	703150	192	4.8	54.1	72.4	21.5	10.4	93.5	11.5	3.2	50.5
22	1342	16	3	3	6	6	68	nkhotakota	444408	91	9.4	46.5	70.5	12	10.7	90.7	9.4	3.3	53.4
15	1342	16	3	3	7	7	69	nctheu	653573	203	1.6	57.5	71.6	17.6	5.7	93.8	6.4	4.4	54.1
0	1342	16	3	3	8	8	70	ncthisi	337459	186	4.5	52.6	71.5	10.7	3.1	94.6	4	3.8	53.5
16	1342	16	3	3	9	9	71	salima	486166	222	7	51.5	70.6	11.6	9.3	92.1	5.3	3.7	58.4
220	1342	16	3	3	10	10	72	lilongwe	1643430	282	2.3	63.3	75.3	15.8	9.9	95.2	8.4	4	47.9
18	1342	16	3	3	11	11	73	chitipa	247196	54	9.3	46.3	60.9	3.8	6	91.4	0.8	3.8	73.8
13	1342	16	3	3	12	12	74	karonga	393957	107	16.3	38.9	67.7	2.6	24.7	89	6.2	3.4	57.1
143	1342	16	3	3	13	13	75	mzimba	237914	90	6.4	37.1	64.3	9.8	13.8	86.8	8.2	4.2	42.9
17	1342	16	3	3	14	14	76	nkhatabay	316018	68	12.3	28.1	63.9	8.3	9	84.3	6.2	4	57.7
9	1342	16	3	3	15	15	77	rumphi	237914	50	17.8	33.5	69.4	4.4	15.9	88.4	3	3.5	53.6
0	1342	16	3	3	16	16	78	likoma	10523	726	79.7	19.4	52.4	2.4	21	65.9	6.5	3.9	31.4
143	1342	16	3	3	17	17	79	mzuzu	237914	90	6.4	37.1	64.3	9.8	13.8	86.8	8.2	4.2	42.9
357	1342	16	3	3	18	18	80	blantyre	447177	253	7.6	48.6	67.2	8.2	9.1	88.6	6.1	4.2	38.9
15	1342	16	3	3	19	19	81	chikwawa	619645	116	6.9	52.9	70.1	9.8	10.7	93.7	9.2	4	63.2
7	1342	16	3	3	20	20	82	chiradzulu	340614	469	1.3	58.9	69.8	4.3	13.3	94.2	6.5	5.2	66.4
26	1342	16	3	3	21	21	83	machinga	712540	205	3.5	54.2	70.2	18.4	14.5	94.5	6.5	4	72.4
59	1342	16	3	3	22	22	84	mangochi	1215905	171	5.7	52.9	73.3	21.9	12.4	92.7	3.4	3.9	59.5
7	1342	16	3	3	23	23	85	mulanje	612153	341	8.8	54.1	65.5	5.8	4.4	93.2	7.2	4.7	69.2
7	1342	16	3	3	24	24	86	mwanza	293902	133	7.8	52.6	65.9	24.6	4.9	87.6	4.8	3.5	53.6
21	1342	16	3	3	25	25	87	nsanje	319635	154	3.5	56.5	74.9	12.3	6.1	94.7	14	4.7	74.3
14	1342	16	3	3	26	26	88	thyolo	705136	433	2.9	56.3	67.8	7.4	12.6	93	7.8	4.6	67.3
29	1342	16	3	3	27	27	89	zomba	725344	316	5.9	53.7	65.3	15	8.6	93.7	5.4	4.5	55.9
4	1342	16	3	3	28	28	90	phalombe	426572	325	6.2	56.3	65.8	8.3	2.6	95.4	5.4	4.2	83.2
19	1342	16	3	3	29	29	91	balaka	466518	205	6.1	47.2	66.5	18.6	14.7	91	4.2	4.4	61.3
357	1342	16	3	3	30	30	92	blantyre city	447177	253	7.6	48.6	67.2	8.2	9.1	88.6	6.1	4.2	38.9
29	1342	16	3	3	31	31	93	zomba	725344	316	5.9	53.7	65.3	15	8.6	93.7	5.4	4.5	55.9
10	2907	59	4	4	1	1	94	dedza	825925	221	3	65.6	75	16.1	15.3	95.1	6.6	4.4	63.1
38	2907	59	4	4	2	2	95	dowa	938620	251	4.1	54.6	70.5	13.2	7.5	94.3	4.9	3.9	48.8
18	2907	59	4	4	3	3	96	kasungu	1001534	105	5.1	47	67.2	12.8	13.8	92.7	4.9	3.1	53
316	2907	59	4	4	4	4	97	lilongwe	1643430	282	2.3	63.3	75.3	15.8	9.9	95.2	8.4	4	47.9
39	2907	59	4	4	5	5	98	mchinji	703150	192	4.8	54.1	72.4	21.5	10.4	93.5	11.5	3.2	50.5
7	2907	59	4	4	6	6	99	nkhotakota	444408	91	9.4	46.5	70.5	12	10.7	90.7	9.4	3.3	53.4
20	2907	59	4	4	7	7	100	nctheu	653573	203	1.6	57.5	71.6	17.6	5.7	93.8	6.4	4.4	54.1
0	2907	59	4	4	8	8	101	ncthisi	337459	186	4.5	52.6	71.5	10.7	3.1	94.6	4	3.8	53.5
5	2907	59	4	4	9	9	102	salima	486166	222	7	51.5	70.6	11.6	9.3	92.1	5.3	3.7	58.4
316	2907	59	4	4	10	10	103	lilongwe	1643430	282	2.3	63.3	75.3	15.8	9.9	95.2	8.4	4	47.9
25	2907	59	4	4	11	11	104	chitipa	247196	54	9.3	46.3	60.9	3.8	6	91.4	0.8	3.8	73.8
16	2907	59	4	4	12	12	105	karonga	393957	107	16.3	38.9	67.7	2.6	24.7	89	6.2	3.4	57.1
353	2907	59	4	4	13	13	106	mzimba	237914	90	6.4	37.1	64.3	9.8	13.8	86.8	8.2	4.2	42.9
63	2907	59	4	4	14	14	107	nkhatabay	316018	68	12.3	28.1	63.9	8.3	9	84.3	6.2	4	57.7
13	2907	59	4	4	15	15	108	rumphi	237914	50	17.8	33.5	69.4	4.4	15.9	88.4	3	3.5	53.6
1	2907	59	4	4	16	16	109	likoma	10523	726	79.7	19.4	52.4	2.4	21	65.9	6.5	3.9	31.4
353	2907	59	4	4	17	17	110	mzuzu	237914	90	6.4	37.1	64.3	9.8	13.8	86.8	8.2	4.2	42.9
423	2907	59	4	4	18	18	111	blantyre	447177	253	7.6	48.6	67.2	8.2	9.1	88.6	6.1	4.2	38.9
3	2907	59	4	4	19	19	112	chikwawa	619645	116	6.9	52.9	70.1	9.8	10.7	93.7	9.2	4	63.2
6	2907	59	4	4	20	20	113	chiradzulu	340614	469	1.3	58.9	69.8	4.3	13.3	94.2	6.5	5.2	66.4
16	2907	59	4	4	21	21	114	machinga	712540	205	3.5	54.2	70.2	18.4	14.5	94.5	6.5	4	72.4
41	2907	59	4	4	22	22	115	mangochi	1215905	171	5.7	52.9	73.3	21.9	12.4	92.7	3.4	3.9	59.5
16	2907	59	4	4	23	23	116	mulanje	612153	341	8.8	54.1	65.5	5.8	4.4	93.2	7.2	4.7	69.2
52	2907	59	4	4	24	24	117	mwanza	293902	133	7.8	52.6	65.9	24.6	4.9	87.6	4.8	3.5	53.6
7	2907	59	4	4	25	25	118	nsanje	319635	154	3.5	56.5	74.9	12.3	6.1	94.7	14	4.7	74.3
21	2907	59	4	4	26	26	119	thyolo	705136	433	2.9	56.3	67.8	7.4	12.6	93	7.8	4.6	67.3
33	2907	59	4	4	27	27	120	zomba	725344	316	5.9	53.7	65.3	15	8.6	93.7	5.4	4.5	55.9
4	2907	59	4	4	28	28	121	phalombe	426572	325	6.2	56.3	65.8	8.3	2.6	95.4	5.4	4.2	83.2
15	2907	59	4	4	29	29	122	balaka	466518	205	6.1	47.2	66.5	18.6	14.7	91	4.2	4.4	61.3
423	2907	59	4	4	30	30	123	blantyre city	447177	253	7.6	48.6	67.2	8.2	9.1	88.6	6.1	4.2	38.9
33	2907	59	4	4	31	31	124	zomba	725344	316	5.9	53.7	65.3	15	8.6	93.7	5.4	4.5	55.9
27	5523	174	5	5	1	1	125	dedza	825925	221	3	65.6	75	16.1	15.3	95.1	6.6	4.4	63.1
22	5523	174	5	5	2	2	126	dowa	938620	251	4.1	54.6	70.5	13.2	7.5	94.3	4.9	3.9	48.8
19	5523	174	5	5	3	3	127	kasungu	1001534	105	5.1	47	67.2	12.8	13.8	92.7	4.9	3.1	53
695	5523	174	5	5	4	4	128	lilongwe	1643430	282	2.3	63.3	75.3	15.8	9.9	95.2	8.4	4	47.9
19	5523	174	5	5	5	5	129	mchinji	703150	192	4.8	54.1	72.4	21.5	10.4	93.5	11.5	3.2	50.5
51	5523	174	5	5	6	6	130	nkhotakota	444408	91	9.4	46.5	70.5	12	10.7	90.7	9.4	3.3	53.4
8	5523	174	5	5	7	7	131	nctheu	653573	203	1.6	57.5	71.6	17.6	5.7	93.8	6.4	4.4	54.1
4	5523	174	5	5	8	8	132	ncthisi	337459	186	4.5	52.6	71.5	10.7	3.1	94.6	4	3.8	53.5
27	5523	174	5	5	9	9	133	salima	486166	222	7	51.5	70.6	11.6	9.3	92.1	5.3	3.7	58.4
695	5523	174	5	5	10	10	134	lilongwe	1643430	282	2.3	63.3	75.3	15.8	9.9	95.2	8.4	4	47.9
21	5523	174	5	5	11	11	135	chitipa	247196	54	9.3	46.3	60.9	3.8	6	91.4	0.8	3.8	73.8
51	5523	174	5	5	12	12	136	karonga	393957	107	16.3	38.9	67.7	2.6	24.7	89	6.2	3.4	57.1
197	5523	174	5	5	13	13	137	mzimba	237914	90	6.4	37.1	64.3	9.8	13.8	86.8	8.2	4.2	42.9
106	5523	174	5	5	14	14	138	nkhatabay	316018	68	12.3	28.1	63.9	8.3	9	84.3	6.2	4	57.7
10	5523	174	5	5	15	15	139	rumphi	237914	50	17.8	33.5	69.4	4.4	15.9	88.4	3	3.5	53.6
3	5523	174	5	5	16	16	140	likoma	10523	726	79.7	19.4	52.4	2.4	21	65.9	6.5	3.9	31.4
197	5523	174	5	5	17	17	141	mzuzu	237914	90	6.4	37.1	64.3	9.8	13.8	86.8	8.2	4.2	42.9
1038	5523	174	5	5	18	18	142	blantyre	447177	253	7.6	48.6	67.2	8.2	9.1	88.6	6.1	4.2	38.9
25	5523	174	5	5	19	19	143	chikwawa	619645	116	6.9	52.9	70.1	9.8	10.7	93.7	9.2	4	63.2
31	5523	174	5	5	20	20	144	chiradzulu	340614	469	1.3	58.9	69.8	4.3	13.3	94.2	6.5	5.2	66.4
27	5523	174	5	5	21	21	145	machinga	712540	205	3.5	54.2	70.2	18.4	14.5	94.5	6.5	4	72.4
43	5523	174	5	5	22	22	146	mangochi	1215905	171	5.7	52.9	73.3	21.9	12.4	92.7	3.4	3.9	59.5
16	5523	174	5	5	23	23	147	mulanje	612153	341	8.8	54.1	65.5	5.8	4.4	93.2	7.2	4.7	69.2
27	5523	174	5	5	24	24	148	mwanza	293902	133	7.8	52.6	65.9	24.6	4.9	87.6	4.8	3.5	53.6
4	5523	174	5	5	25	25	149	nsanje	319635	154	3.5	56.5	74.9	12.3	6.1	94.7	14	4.7	74.3
15	5523	174	5	5	26	26	150	thyolo	705136	433	2.9	56.3	67.8	7.4	12.6	93	7.8	4.6	67.3
86	5523	174	5	5	27	27	151	zomba	725344	316	5.9	53.7	65.3	15	8.6	93.7	5.4	4.5	55.9
2	5523	174	5	5	28	28	152	phalombe	426572	325	6.2	56.3	65.8	8.3	2.6	95.4	5.4	4.2	83.2
13	5523	174	5	5	29	29	153	balaka	466518	205	6.1	47.2	66.5	18.6	14.7	91	4.2	4.4	61.3
1038	5523	174	5	5	30	30	154	blantyre city	447177	253	7.6	48.6	67.2	8.2	9.1	88.6	6.1	4.2	38.9
86	5523	174	5	5	31	31	155	zomba	725344	316	5.9	53.7	65.3	15	8.6	93.7	5.4	4.5	55.9
0	5773	179	6	6	1	1	156	dedza	825925	221	3	65.6	75	16.1	15.3	95.1	6.6	4.4	63.1
10	5773	179	6	6	2	2	157	dowa	938620	251	4.1	54.6	70.5	13.2	7.5	94.3	4.9	3.9	48.8
1	5773	179	6	6	3	3	158	kasungu	1001534	105	5.1	47	67.2	12.8	13.8	92.7	4.9	3.1	53
83	5773	179	6	6	4	4	159	lilongwe	1643430	282	2.3	63.3	75.3	15.8	9.9	95.2	8.4	4	47.9
2	5773	179	6	6	5	5	160	mchinji	703150	192	4.8	54.1	72.4	21.5	10.4	93.5	11.5	3.2	50.5
3	5773	179	6	6	6	6	161	nkhotakota	444408	91	9.4	46.5	70.5	12	10.7	90.7	9.4	3.3	53.4
1	5773	179	6	6	7	7	162	nctheu	653573	203	1.6	57.5	71.6	17.6	5.7	93.8	6.4	4.4	54.1
0	5773	179	6	6	8	8	163	ncthisi	337459	186	4.5	52.6	71.5	10.7	3.1	94.6	4	3.8	53.5
0	5773	179	6	6	9	9	164	salima	486166	222	7	51.5	70.6	11.6	9.3	92.1	5.3	3.7	58.4
83	5773	179	6	6	10	10	165	lilongwe	1643430	282	2.3	63.3	75.3	15.8	9.9	95.2	8.4	4	47.9
0	5773	179	6	6	11	11	166	chitipa	247196	54	9.3	46.3	60.9	3.8	6	91.4	0.8	3.8	73.8
0	5773	179	6	6	12	12	167	karonga	393957	107	16.3	38.9	67.7	2.6	24.7	89	6.2	3.4	57.1
12	5773	179	6	6	13	13	168	mzimba	237914	90	6.4	37.1	64.3	9.8	13.8	86.8	8.2	4.2	42.9
4	5773	179	6	6	14	14	169	nkhatabay	316018	68	12.3	28.1	63.9	8.3	9	84.3	6.2	4	57.7
4	5773	179	6	6	15	15	170	rumphi	237914	50	17.8	33.5	69.4	4.4	15.9	88.4	3	3.5	53.6
0	5773	179	6	6	16	16	171	likoma	10523	726	79.7	19.4	52.4	2.4	21	65.9	6.5	3.9	31.4
12	5773	179	6	6	17	17	172	mzuzu	237914	90	6.4	37.1	64.3	9.8	13.8	86.8	8.2	4.2	42.9
100	5773	179	6	6	18	18	173	blantyre	447177	253	7.6	48.6	67.2	8.2	9.1	88.6	6.1	4.2	38.9
2	5773	179	6	6	19	19	174	chikwawa	619645	116	6.9	52.9	70.1	9.8	10.7	93.7	9.2	4	63.2
3	5773	179	6	6	20	20	175	chiradzulu	340614	469	1.3	58.9	69.8	4.3	13.3	94.2	6.5	5.2	66.4
4	5773	179	6	6	21	21	176	machinga	712540	205	3.5	54.2	70.2	18.4	14.5	94.5	6.5	4	72.4
2	5773	179	6	6	22	22	177	mangochi	1215905	171	5.7	52.9	73.3	21.9	12.4	92.7	3.4	3.9	59.5
3	5773	179	6	6	23	23	178	mulanje	612153	341	8.8	54.1	65.5	5.8	4.4	93.2	7.2	4.7	69.2
1	5773	179	6	6	24	24	179	mwanza	293902	133	7.8	52.6	65.9	24.6	4.9	87.6	4.8	3.5	53.6
3	5773	179	6	6	25	25	180	nsanje	319635	154	3.5	56.5	74.9	12.3	6.1	94.7	14	4.7	74.3
6	5773	179	6	6	26	26	181	thyolo	705136	433	2.9	56.3	67.8	7.4	12.6	93	7.8	4.6	67.3
5	5773	179	6	6	27	27	182	zomba	725344	316	5.9	53.7	65.3	15	8.6	93.7	5.4	4.5	55.9
0	5773	179	6	6	28	28	183	phalombe	426572	325	6.2	56.3	65.8	8.3	2.6	95.4	5.4	4.2	83.2
2	5773	179	6	6	29	29	184	balaka	466518	205	6.1	47.2	66.5	18.6	14.7	91	4.2	4.4	61.3
100	5773	179	6	6	30	30	185	blantyre city	447177	253	7.6	48.6	67.2	8.2	9.1	88.6	6.1	4.2	38.9
5	5773	179	6	6	31	31	186	zomba	725344	316	5.9	53.7	65.3	15	8.6	93.7	5.4	4.5	55.9
2	5904	184	7	7	1	1	187	dedza	825925	221	3	65.6	75	16.1	15.3	95.1	6.6	4.4	63.1
14	5904	184	7	7	2	2	188	dowa	938620	251	4.1	54.6	70.5	13.2	7.5	94.3	4.9	3.9	48.8
0	5904	184	7	7	3	3	189	kasungu	1001534	105	5.1	47	67.2	12.8	13.8	92.7	4.9	3.1	53
31	5904	184	7	7	4	4	190	lilongwe	1643430	282	2.3	63.3	75.3	15.8	9.9	95.2	8.4	4	47.9
1	5904	184	7	7	5	5	191	mchinji	703150	192	4.8	54.1	72.4	21.5	10.4	93.5	11.5	3.2	50.5
3	5904	184	7	7	6	6	192	nkhotakota	444408	91	9.4	46.5	70.5	12	10.7	90.7	9.4	3.3	53.4
1	5904	184	7	7	7	7	193	nctheu	653573	203	1.6	57.5	71.6	17.6	5.7	93.8	6.4	4.4	54.1
0	5904	184	7	7	8	8	194	ncthisi	337459	186	4.5	52.6	71.5	10.7	3.1	94.6	4	3.8	53.5
0	5904	184	7	7	9	9	195	salima	486166	222	7	51.5	70.6	11.6	9.3	92.1	5.3	3.7	58.4
31	5904	184	7	7	10	10	196	lilongwe	1643430	282	2.3	63.3	75.3	15.8	9.9	95.2	8.4	4	47.9
0	5904	184	7	7	11	11	197	chitipa	247196	54	9.3	46.3	60.9	3.8	6	91.4	0.8	3.8	73.8
0	5904	184	7	7	12	12	198	karonga	393957	107	16.3	38.9	67.7	2.6	24.7	89	6.2	3.4	57.1
20	5904	184	7	7	13	13	199	mzimba	237914	90	6.4	37.1	64.3	9.8	13.8	86.8	8.2	4.2	42.9
1	5904	184	7	7	14	14	200	nkhatabay	316018	68	12.3	28.1	63.9	8.3	9	84.3	6.2	4	57.7
4	5904	184	7	7	15	15	201	rumphi	237914	50	17.8	33.5	69.4	4.4	15.9	88.4	3	3.5	53.6
0	5904	184	7	7	16	16	202	likoma	10523	726	79.7	19.4	52.4	2.4	21	65.9	6.5	3.9	31.4
20	5904	184	7	7	17	17	203	mzuzu	237914	90	6.4	37.1	64.3	9.8	13.8	86.8	8.2	4.2	42.9
52	5904	184	7	7	18	18	204	blantyre	447177	253	7.6	48.6	67.2	8.2	9.1	88.6	6.1	4.2	38.9
0	5904	184	7	7	19	19	205	chikwawa	619645	116	6.9	52.9	70.1	9.8	10.7	93.7	9.2	4	63.2
0	5904	184	7	7	20	20	206	chiradzulu	340614	469	1.3	58.9	69.8	4.3	13.3	94.2	6.5	5.2	66.4
0	5904	184	7	7	21	21	207	machinga	712540	205	3.5	54.2	70.2	18.4	14.5	94.5	6.5	4	72.4
5	5904	184	7	7	22	22	208	mangochi	1215905	171	5.7	52.9	73.3	21.9	12.4	92.7	3.4	3.9	59.5
0	5904	184	7	7	23	23	209	mulanje	612153	341	8.8	54.1	65.5	5.8	4.4	93.2	7.2	4.7	69.2
0	5904	184	7	7	24	24	210	mwanza	293902	133	7.8	52.6	65.9	24.6	4.9	87.6	4.8	3.5	53.6
0	5904	184	7	7	25	25	211	nsanje	319635	154	3.5	56.5	74.9	12.3	6.1	94.7	14	4.7	74.3
2	5904	184	7	7	26	26	212	thyolo	705136	433	2.9	56.3	67.8	7.4	12.6	93	7.8	4.6	67.3
2	5904	184	7	7	27	27	213	zomba	725344	316	5.9	53.7	65.3	15	8.6	93.7	5.4	4.5	55.9
0	5904	184	7	7	28	28	214	phalombe	426572	325	6.2	56.3	65.8	8.3	2.6	95.4	5.4	4.2	83.2
0	5904	184	7	7	29	29	215	balaka	466518	205	6.1	47.2	66.5	18.6	14.7	91	4.2	4.4	61.3
52	5904	184	7	7	30	30	216	blantyre city	447177	253	7.6	48.6	67.2	8.2	9.1	88.6	6.1	4.2	38.9
2	5904	184	7	7	31	31	217	zomba	725344	316	5.9	53.7	65.3	15	8.6	93.7	5.4	4.5	55.9
